# Supplementary material for: The Content of Total Carotenoids, Vitamin C and Antioxidant Properties of 65 Potato Cultivars Characterised under the European Project ECOBREED
Source: MDPI journal article supplement (doi:10.3390/ijms241411716), 2023-07-20

## Supplementary Materials

Table S1. Geographic, soil, fertilization, and fore crops data for field experiments.

| Location | Geographic coordinates      | Type of soil | Year | Pre-crop | Doses of fertilizers kg ha <sup>-1</sup>                                                 |
|----------|-----------------------------|--------------|------|----------|------------------------------------------------------------------------------------------|
| Młochów  | 52° 3' 0" N<br>20° 46' 7" E | Podzols      | 2019 | rape     | 36 N, 30 P <sub>2</sub> O <sub>5</sub> , 54 K <sub>2</sub> O<br>25t/ha composted manure  |
|          |                             |              | 2020 | oat      | 36 N, 30 P <sub>2</sub> O <sub>5</sub> , 54 K <sub>2</sub> O<br>25t/ha composted manure  |
|          |                             |              | 2021 | oat      | 34 N, 26 P <sub>2</sub> O <sub>5</sub> , 50 K <sub>2</sub> O<br>25 t/ha composted manure |

Figure S1. Rainfall (total monthly in mm) and temperature (average in monthly °C) during the A) 2019, B) 2020 and C) 2021 potato growing seasons in Młochów.

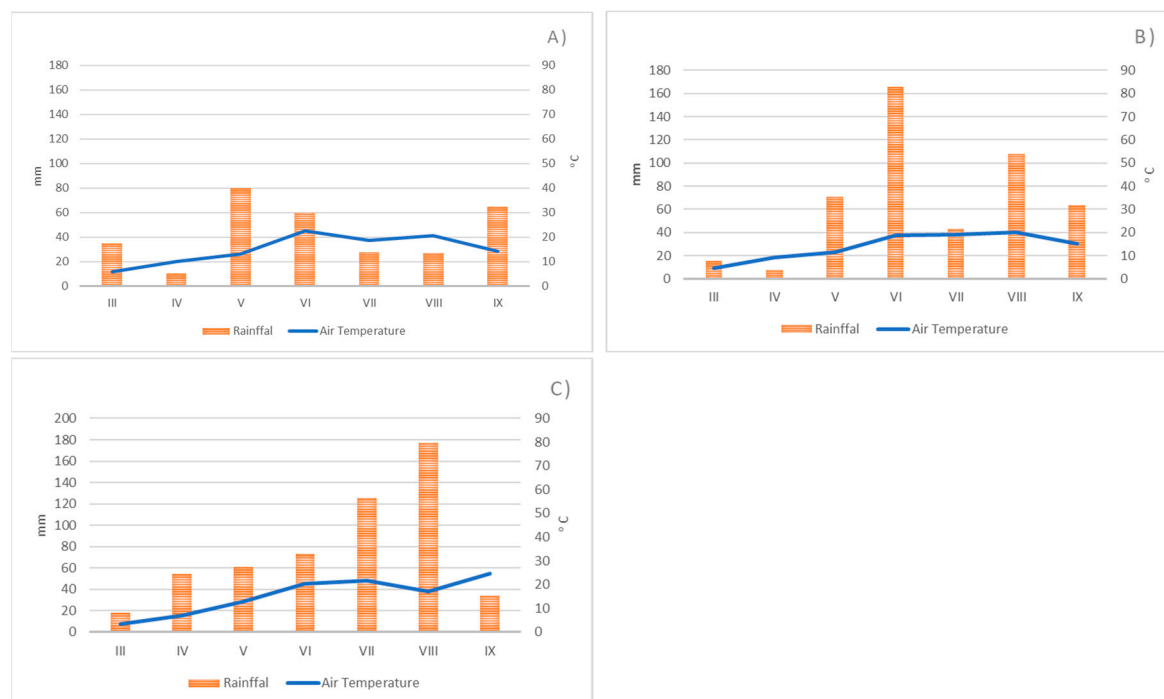

Supplement: s1 [file s1]
